# Supplementary material for: Frequency doubling in the cyanobacterial circadian clock
Source: PubMed Central journal article supplement (PMC5199125; doi:10.15252/msb.20167087), 2016-12-22
Supplement: MSB-12-896-s001.pdf [file MSB-12-896-s001.pdf]

# Frequency doubling in the cyanobacterial circadian clock

Bruno M.C. Martins<sup>1+</sup>, Arijit K. Das<sup>1+</sup>, Liliana Antunes<sup>1,2</sup>, James C.W. Locke<sup>1,3,4\*</sup>

<sup>1</sup>Sainsbury Laboratory, University of Cambridge, Bateman Street, Cambridge CB2 1LR, UK

<sup>2</sup>Wellcome Trust Sanger Institute, Hinxton, Cambridge CB10 1SA, UK

<sup>3</sup>Department of Biochemistry, University of Cambridge, Cambridge CB2 1QW, UK

<sup>4</sup>Microsoft Research, 21 Station Road, Cambridge CB1 2FB, UK

## Appendix

### Table of contents

|                                                                  |    |
|------------------------------------------------------------------|----|
| I. Appendix figures                                              | 2  |
| II. Mathematical model                                           | 9  |
| III. Generation of double peaks from an activator-repressor gate | 12 |

20 I. Appendix figures

21

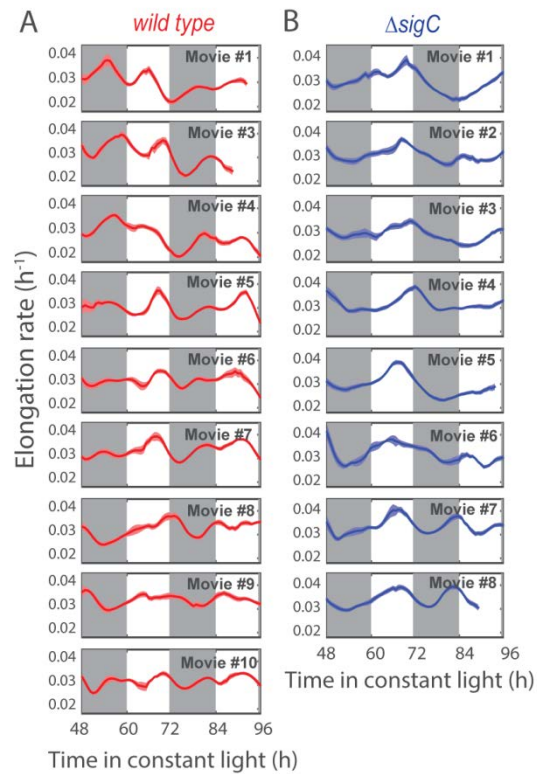

22

23

24 Figure S1: **Two peak circadian oscillations in growth can be observed in wild type cells.**

25 A. Mean of individual cell elongation rates from nine movies of  $P_{psbA1}$ -YFP reporter in WT background  
26 between 48 and 96 hours. Movie #2 not shown as it ended after just 80 hours. Daily double peaks of  
27 growth rate can be observed. The pink shade represents the standard error of the mean.

28 B. Mean of individual cell elongation rates for eight movies of *sigC* deletion strains. Single peak  
29 circadian oscillations in growth can be observed in the majority of cases. The blue shade represents  
30 the standard error of the mean.

31

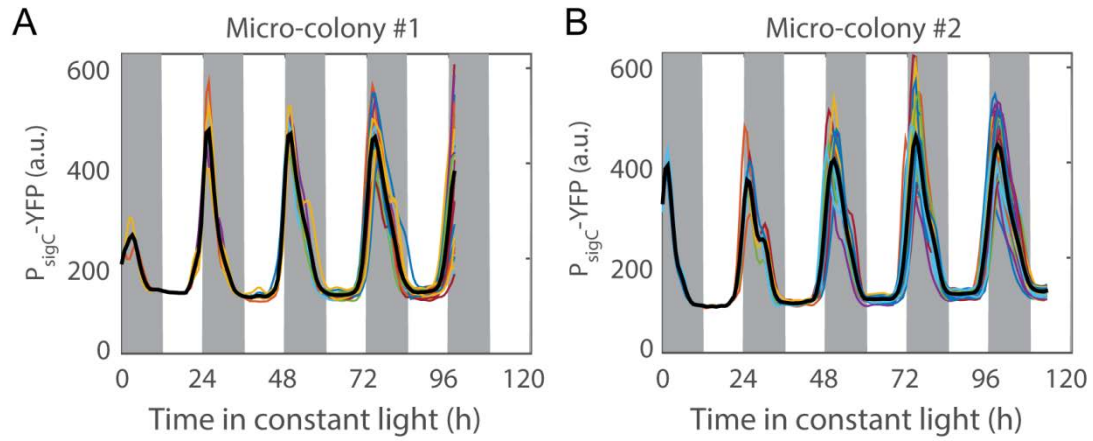

32

33

34 **Figure S2: Single cell lineages from two movies of *sigC* expression show single peak oscillations.**

35 A-B. Time traces of  $P_{sigC}$ -YFP reporter strains grown under low light (ca.  $15 \mu\text{E m}^{-2} \text{s}^{-1}$  cool white light).

36 Individual lineages show high amplitude narrow peaks and an absence of frequency doubling. The

37 black line represents the mean across all single cell traces.

38

39

40

41

42

43

44

45

46

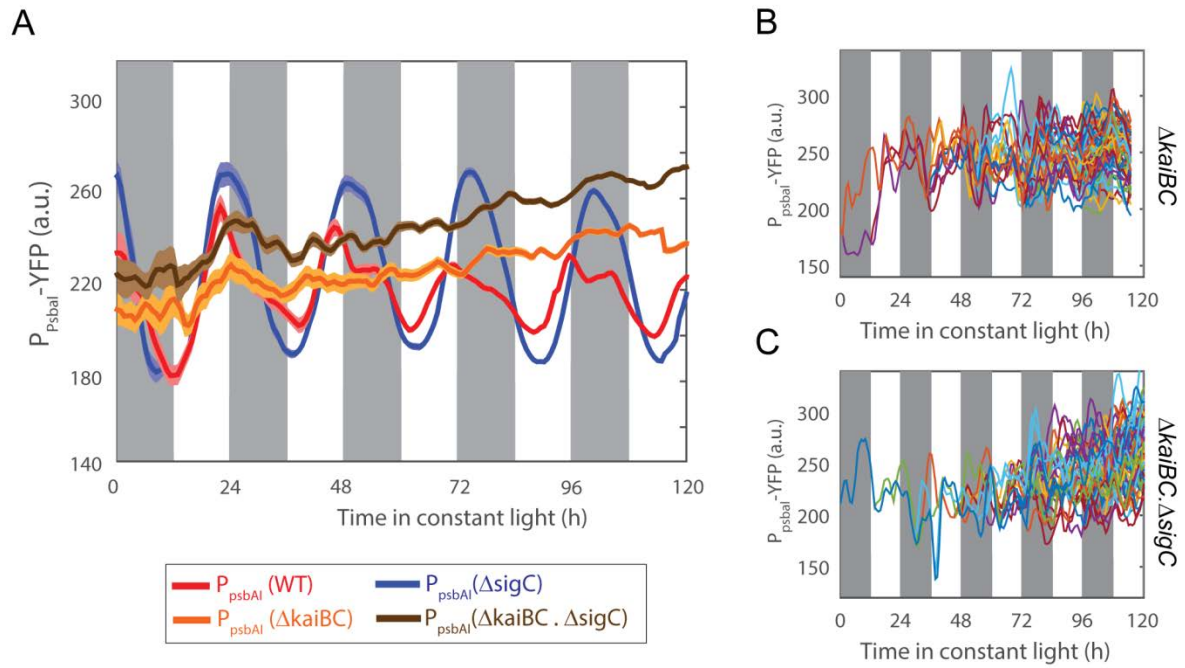

47

48

49 **Figure S3: Expression of  $P_{psbAI}$ -YFP in mutant backgrounds reveals that oscillatory dynamics are due**  
 50 **to  $sigC$  and the circadian clock.**

51 A. Mean traces of  $P_{psbAI}$ -YFP in WT (red),  $sigC$  deletion (blue),  $kaiBC$  deletion (orange), and  $kaiBC$ - $sigC$   
 52 double deletion backgrounds (brown). For the wild type strain, 1319 cells from 10 movies (with up to  
 53 419 cells per time point) were collected. For the  $sigC$  deletion strain, 1088 cells from 8 movies (with  
 54 up to 419 cells per time point) were collected. For the  $kaiBC$  deletion strain, 1332 cells from 8 movies  
 55 (with up to 501 cells per time point) were collected. For the  $kaiBC$ - $sigC$  double deletion strain, 2249  
 56 cells from 12 movies (with up to 641 cells per time point) were collected. The colour shades  
 57 represent standard errors of the mean. Circadian oscillations are abolished in  $kaiBC$  deletion and  
 58  $kaiBC$ - $sigC$  double deletion backgrounds.

59 B-C. Fluctuations are observed in single cell lineages in a  $KaiBC$  deletion background (B) and in a  
 60  $kaiBC$ - $sigC$  (C) double deletion background.

61

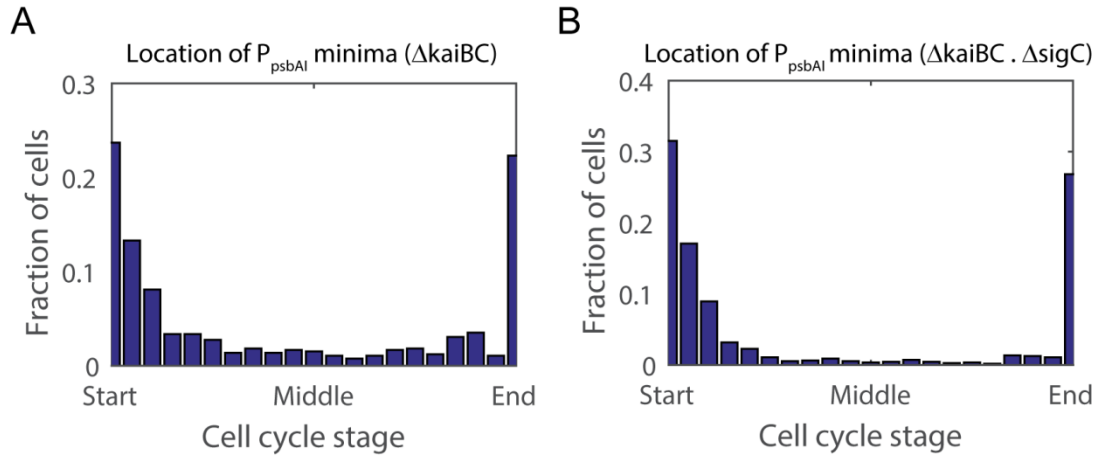

62

63

64 **Figure S4: Location of YFP minima along the cell cycle for  $P_{psbAI}$ -YFP.**

65 A-B. The location of expression minima reveals that fluctuations observed in *kaiBC* deletion (A) and

66 *kaiBC-sigC* double deletion (B) strains are due to dips in expression occurring at around the time of

67 division.

68

69

70

71

72

73

74

75

76

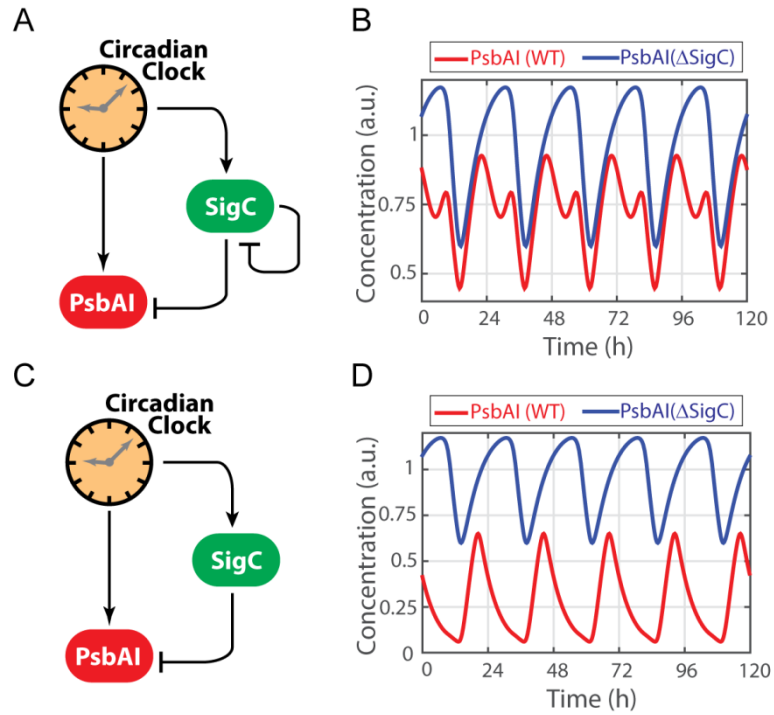

77

78

79 **Figure S5: The negative feedback of SigC on itself enhances double peaks.**

80 A-D. The negative auto-regulatory function of SigC (A, C) provides an additional level of control to  
 81 allow a doubling of the frequency of peaks of expression in numerical simulations (B, D). Other than  
 82 removing the feedback, the same parameter set was used in the simulations in (B) and (D).

83

84

85

86

87

88

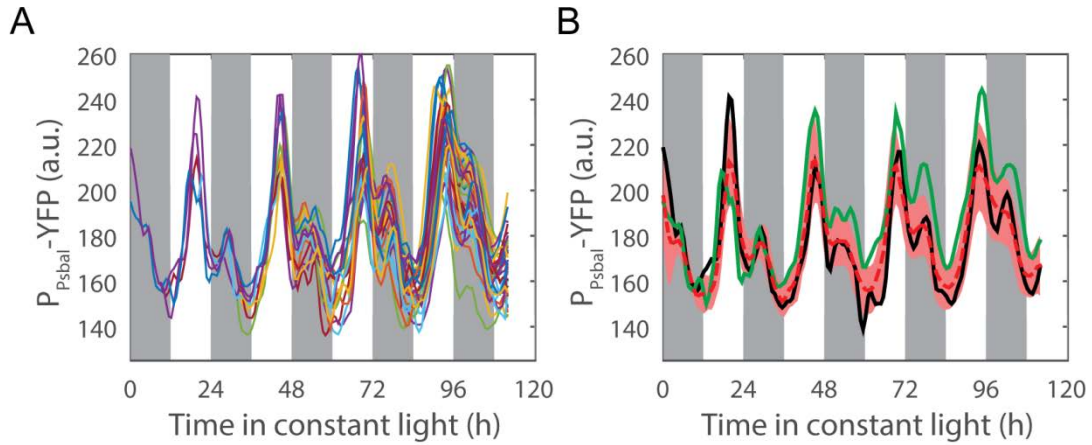

89

90

91 **Figure S6: Single cell lineages from one movie of *psbAI* expression under very low light conditions**

92 **show two peak oscillations.**

93 A. Time traces of  $P_{psbAI}$ -YFP reporter grown under very low light (ca.  $10 \mu\text{E m}^{-2} \text{s}^{-1}$  cool white light).

94 Individual lineages show the existence of a secondary peak following the main (dusk timed) peak of  
 95 expression.

96 B. Two representative traces (green and black) display double peaks, but due to desynchronisation, a

97 double peak is less apparent in the mean trace (red dotted line). Pink shading represents one

98 standard deviation from the mean. 215 cells from 3 movies (with up to 104 cells per time point)

99 were collected.

100

101

102

103

104

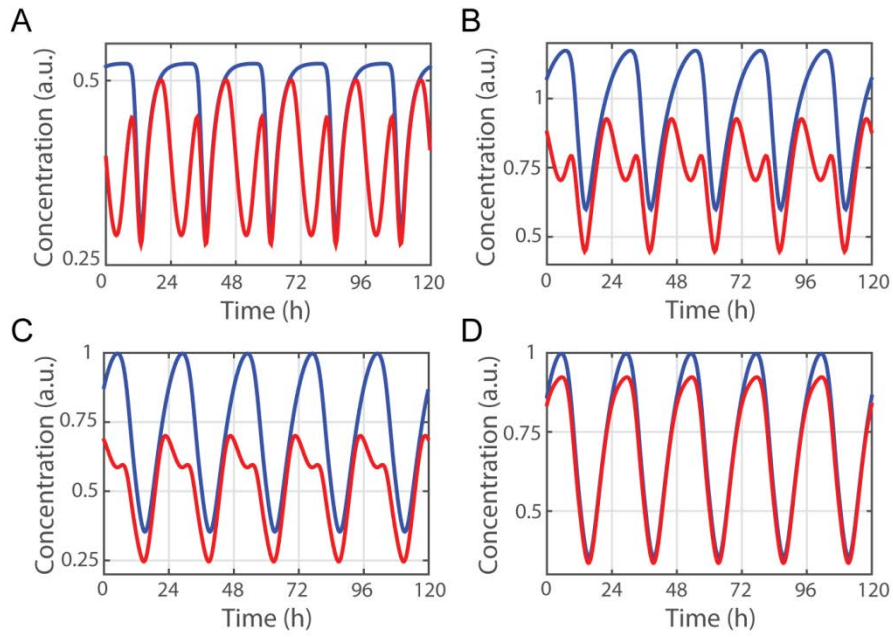

105

106

107 **Figure S7: The oscillatory incoherent feed forward loop model can generate a variety of oscillatory**  
 108 **dynamics.**

109 A-D. Numerical simulations show the strength of the double peak can be tuned from two near equal  
 110 peaks (A) to asymmetric double peaks (B), shoulders (C), and single peaks (D). In all panels, the red  
 111 line represents the wild type and the blue line represents the SigC deletion mutant.

112

113

114

115

116

117

118



## 119 II. Mathematical model

120 The model used in this study is a minimal phenomenological model translated into ordinary  
121 differential equations (ODEs). Our purpose is to gain an understanding of the principles that underlie  
122 the generation of a doubling in the frequency of expression peaks in oscillatory circuits, such as we  
123 observed *in vivo*. We therefore chose not to model the circadian clock explicitly, and to simplify the  
124 regulatory terms. The species in the model are the circadian clock, PsbAI (or RpoD6), and SigC (which  
125 we split into active and inactive forms).

126 We describe the time evolution of the clock,  $\Theta$ , by a sinusoidal signal of the form:

$$127 \quad \Theta(t) = b + \frac{1}{2}(A - b) \left( 1 + \cos\left(\frac{2\pi t}{T_C}\right) \right), \quad (S1)$$

128 where  $T_C = 24$  h,  $b$  is the basal level of the clock signal and  $A$  is its maximum.

129 This clock signal then regulates expression of its targets. For simplicity, we model only transcription  
130 and assume the signal  $\Theta$  directly regulates PsbAI (or RpoD6) and SigC. We represent this regulation  
131 using Hill equation kinetics. In our scheme (Figure 4A in the main text), we postulate SigC negatively  
132 regulates PsbAI and itself. Whether the repressing activity of SigC is direct or indirect remains a  
133 question to be addressed in the future. In our model, and again in the interest of simplicity, we also  
134 represent the activity of SigC by Hill equation kinetics. The total production rate therefore depends  
135 on two variables – the clock and SigC – and incorporates 4 possible states of the “promoter”: no  
136 regulator is “bound”; only the clock output is “bound”; only SigC is “bound”; and both regulators are  
137 “bound”. The total production rate  $f_X$  then becomes:

$$138 \quad f_X = V_X \frac{\left(\frac{\Theta}{K_{\Theta X}}\right)^{h_{\Theta X}}}{1 + \left(\frac{\Theta}{K_{\Theta X}}\right)^{h_{\Theta X}} + \left(\frac{[SigC_{a1}]}{K_{SX}}\right)^{h_{SX}} + \left(\frac{\Theta}{K_{\Theta X}}\right)^{h_{\Theta X}} \left(\frac{[SigC_{a1}]}{K_{SX}}\right)^{h_{SX}}}, \quad (S2)$$

139 where  $V_X$  is the maximal production rate;  $K_{\Theta X}$  is the activation coefficient of species  $X$  by the clock;  
140  $h_{\Theta X}$  is the degree of cooperativity of that activation;  $K_{SX}$  is the repression coefficient of species  $X$  by

141 SigC (by its active form  $SigC_a$ );  $h_{SX}$  is the degree of cooperativity of that repression; and  $[SigC_a]$  is  
 142 the concentration of the active form of SigC (the only form that can affect expression of downstream  
 143 targets). We normalise our model by dividing all species, maximal rates and  $K$  coefficients by the  
 144 maximal output of the clock ( $A$ ). This operation means the system is effectively modelled in units of  
 145 clock output.

146 The system of ODEs is:

$$147 \quad \frac{d[PsbA1]}{dt} = V_P \frac{\left(\frac{\theta}{K_{\theta P}}\right)^{h_{\theta P}}}{1 + \left(\frac{\theta}{K_{\theta P}}\right)^{h_{\theta P}} + \left(\frac{[SigC_a]}{K_{SP}}\right)^{h_{SP}} + \left(\frac{\theta}{K_{\theta P}}\right)^{h_{\theta P}} \left(\frac{[SigC_a]}{K_{SP}}\right)^{h_{SP}}} - \log(2) \left(\frac{1}{T_d} + \frac{1}{T_Y}\right) [PsbA1], \quad (S3)$$

$$148 \quad \frac{d[SigC]}{dt} = V_S \frac{\left(\frac{\theta}{K_{\theta S}}\right)^{h_{\theta S}}}{1 + \left(\frac{\theta}{K_{\theta S}}\right)^{h_{\theta S}} + \left(\frac{[SigC_a]}{K_{SS}}\right)^{h_{SS}} + \left(\frac{\theta}{K_{\theta S}}\right)^{h_{\theta S}} \left(\frac{[SigC_a]}{K_{SS}}\right)^{h_{SS}}} - \log(2) \left(\frac{1}{T_d} + \frac{1}{T_S}\right) [SigC] - k_f [SigC] +$$

149  $+ k_b [SigC_a],$  (S4)

$$150 \quad \frac{d[SigC_a]}{dt} = -\log(2) \left(\frac{1}{T_d} + \frac{1}{T_S}\right) [SigC_a] + k_f [SigC] - k_b [SigC_a]. \quad (S5)$$

151 In equations (S3) and (S4), the parameters in the production rate terms are as described in Equation  
 152 (S2) (with the subscripts  $P$  and  $S$  representing  $PsbA1$  and  $SigC$  respectively). In the dilution terms,  
 153  $T_d$  is the average cell cycle duration (and so it represents dilution by cell growth),  $T_Y$  is the reported  
 154 half-life of the fluorescent reporter used in the experiments (YFP\_LVA) (Chabot et al, 2007), and  $T_S$  is  
 155 half-life of of SigC (we assume both forms of SigC are unstable and have the same half-life).  $k_f$  and  
 156  $k_b$  are the forward and back rates of activation of SigC. This reaction may, for example, represent  
 157 binding and unbinding of SigC to the RNA polymerase. We choose to include this reaction in our  
 158 system in order to be able to model the possible effects of environmental perturbations in the  
 159 activity of SigC.

160 The SigC deletion mutant is simulated by eliminating the two last terms in the denominator of the  
 161 production rate, i.e.,

$$162 \quad \frac{d[PsbA1^{mut}]}{dt} = V_P \frac{\left(\frac{\theta}{K_{\theta P}}\right)^{h_{\theta P}}}{1 + \left(\frac{\theta}{K_{\theta P}}\right)^{h_{\theta P}}} - \log(2) \left(\frac{1}{T_d} + \frac{1}{T_Y}\right) [PsbA1^{mut}]. \quad (S6)$$

163 *RpoD6* is modelled by an equation equivalent to Equation (S3), updating the respective parameters.

164 To generate the numerical simulations presented in the main text and supplementary figures, the  
 165 initial conditions of all species are set to 0. The system is simulated for 600 h, but only the final 120 h  
 166 are shown with  $t=0$  scaled accordingly. In Figure 4 we used the following set of parameters:

167 Table S1: Parameters used for the simulations in Figure 4.

| Parameter      | Description                                                                                | Value<br>(in units of<br>clock output) |
|----------------|--------------------------------------------------------------------------------------------|----------------------------------------|
| $b$            | basal level of the clock                                                                   | 0                                      |
| $A$            | maximal level of the clock                                                                 | 1                                      |
| $V_S$          | maximal production rate of SigC                                                            | $3.7 \text{ h}^{-1}$                   |
| $K_{\theta S}$ | activation coefficient of SigC by the clock                                                | 0.9                                    |
| $K_{SS}$       | repression coefficient of SigC by itself (by its active form $SigC_a$ )                    | 1.4                                    |
| $h_{\theta S}$ | degree of cooperativity on the activation of SigC by the clock                             | 5                                      |
| $h_{SS}$       | degree of cooperativity on the repression of SigC by itself (by its active form $SigC_a$ ) | 2                                      |
| $V_P$          | maximal production rate of PsbAI (or RpoD6)                                                | $0.2 \text{ h}^{-1}$                   |
| $K_{\theta P}$ | activation coefficient of PsbAI (or RpoD6) by the clock                                    | 0.1                                    |
| $K_{SP}$       | repression coefficient of PsbAI (or RpoD6) by $SigC_a$                                     | 2.5                                    |
| $h_{\theta P}$ | degree of cooperativity on the activation of PsbAI (or RpoD6) by the clock                 | 2                                      |
| $h_{SP}$       | degree of cooperativity on the repression of PsbAI (or RpoD6) by $SigC_a$                  | 5                                      |
| $T_d$          | mean cell cycle time                                                                       | 19.5 h                                 |
| $T_Y$          | reporter half-life                                                                         | 5.6 h                                  |
| $T_S$          | SigC half-life                                                                             | 6 h                                    |
| $k_f$          | activation rate of SigC                                                                    | $10 \text{ h}^{-1}$                    |
| $k_b$          | deactivation rate of SigC                                                                  | $0.1 \text{ h}^{-1}$                   |

168

169

170 To generate the simulations for RpoD6 shown in Figure 6D, all parameters were kept the same

171 except the activation coefficient  $K_{\theta P}$ , which was set to 0.3. This parameter describes a characteristic

172 of the P<sub>sbAI</sub> and R<sub>poD6</sub> “promoters” (e.g., its sequence), and so it is reasonable to assume this is  
173 one parameter biological systems can tune to generate different frequency modulation.

174 To generate the numerical simulations for the higher light perturbation (Figure EV3A, dashed line in  
175 Figure EV3B), we modified the cell cycle duration,  $T_d$ , to 9.3 h (the value we measured  
176 experimentally), and the back rate  $k_b$  to 10 h<sup>-1</sup>. The assumption underlying this modification is that  
177 SigC is less active (or more unstable) at higher light, which is a possible interpretation of our  
178 observations (Figure 5, Figure EV2, Figure EV3). We note that other modifications could be  
179 responsible for the near disappearance of the double peak in the experiments (Figure 5A). For  
180 example, the amplitude of the clock may change under different light conditions (through  
181 parameters  $b$  and  $A$ ), which may also move the output of the model from a double peak to a single  
182 peak result. However, they do not result in the upregulation of sigC expression observed  
183 experimentally (Figure EV2). In Figure EV3B, the sum of the two forms of SigC ( $SigC$  and its active  
184 form  $SigC_a$ ) is shown. The low light simulation (solid red line, Figure EV3B) uses the parameters  
185 from Table S1.

186 Finally, for the simulations shown in Figure S7 (and in inset of Figure 6D), we made the following  
187 changes to the parameters in Table S1: in panel (A)  $b = 0.08$ ,  $h_{SS} = 1$ ,  $h_{\theta P} = 5$ ,  $h_{SP} = 4$ ,  $T_Y = 2$  h,  
188  $T_S = 3$  h; in panel (B) no changes were made; in panel (C)  $K_{\theta P} = 0.3$ ; in panel (D)  $K_{\theta P} = 0.3$ ,  
189  $K_{SP} = 4$ .

190

191

### 192 **III. Generation of double peaks from an activator-repressor gate**

193 **1. Double peaks in production rate.** Our network motif contains an output that is regulated by an  
194 oscillatory positive regulator and an oscillatory negative regulator, as described before. It can be

195 shown that a general model of the kind described by Equation (S2) is intrinsically a two peak model.  
 196 Previous studies have already demonstrated that two oscillatory inputs coupled non-linearly (e.g., an  
 197 AND gate where the output is the product of the two inputs) can generate sub-circadian harmonics  
 198 (Westermarck & Herzl, 2013). In our model we have a production rate given by:

$$199 \quad f = V \frac{u_1}{1+u_1+u_2+u_1 u_2}, \quad (S7)$$

200 where  $u_1$  and  $u_2$  are contributions from inputs 1 (a positive regulator) and 2 (a negative regulator)  
 201 respectively, where

$$202 \quad u_j = \frac{1}{K_{M,j}} \gamma_j \left( 1 + a_j \cos(\omega (t + \phi_j)) \right). \quad (S8)$$

203 Here,  $\gamma_j = (A_j + b_j)/2$ ,  $a_j = (A_j - b_j)/(A + b_j)$ ,  $K_{M,j}$  is a Michaelis-Menten constant,  $\omega_j$  is the  
 204 angular frequency, and  $\phi_j$  is a phase displacement. The terms  $\gamma_j$  and  $a_j$  are only added to ensure  
 205 the input oscillates between a basal level  $b_j > 0$  and a saturation level  $A_j$ . We drop the Hill  
 206 coefficients because if we can show Michaelis-Menten kinetics can generate double peaks, then the  
 207 added non-linearity of the Hill equation should only reinforce that output. Two peaks per circadian  
 208 cycle are possible when the two oscillatory inputs are out of phase (Westermarck & Herzl, 2013). We  
 209 will consider the more restrictive case where they have the same phase ( $\phi_j = 0$ ).

210 In our model, double peaks of expression require double peaks of production rate. We can find the  
 211 double peaks by solving  $\frac{df}{dt} = 0$ . In other words, we need to find the roots of the numerator of  $\frac{df}{dt}$ :

$$212 \quad \sin(\omega t) \left[ a_2 g_2 (1 + g_1) - a_1 (1 + g_2) + a_1 a_2 g_1 g_2 \cos(\omega t) (2 + a_1 \cos(\omega t)) \right] = 0, \quad (S9)$$

213 where  $g_j = \gamma_j / K_{M,j}$ . Since one of the terms is simply  $\sin(\omega t)$ , then one pair of roots is  $t =$

214  $\left\{ \frac{2\pi n}{\omega}, \frac{\pi+2\pi n}{\omega} \right\}, n \in \mathbb{Z}$ . This solution means there is at least one maximum and one minimum, hence

215 one peak. We can find additional roots by solving for the other term in Equation (S9), which yields

216 
$$t = \pm \frac{1}{\omega} \arccos \left[ \frac{-a_1 a_2 g_1 g_2 \pm \sqrt{a_1^2 a_2 g_1 g_2 (a_1 + a_1 g_2 - a_2 g_2)}}{a_1^2 a_2 g_1 g_2} \right]. \quad (\text{S10})$$

217 In the special case where the basal activities are set to zero and  $A_1 = 1$ , Equation (S10) simplifies to

218 
$$t = \pm \frac{1}{\omega} \arccos \left[ -1 \pm \frac{2}{\sqrt{\frac{A_2}{K_{M,1} \cdot K_{M,2}}}} \right]. \quad (\text{S11})$$

219 Equation (S9) has only real positive roots when the argument of arccos is in the range  $[-1, 1]$ , and so  
 220 the condition  $\frac{A_2}{K_{M,1} \cdot K_{M,2}} > 1$  must be verified. So long as the Michaelis-Menten constants are smaller

221 than the maximal value of the input oscillators, which is a reasonable assumption, then that

222 condition is verified. If, for example,  $A_2 = A_1 = 1$  and  $K_{M,1} = K_{M,2} = 1/2$ , the whole set of

223 solutions is  $t = \left\{ \frac{2\pi n - \frac{\pi}{2}}{\omega}, \frac{2\pi n}{\omega}, \frac{2\pi n + \frac{\pi}{2}}{\omega}, \frac{\pi + 2\pi n}{\omega} \right\}, n \in \mathbb{Z}$ , and so the system generates two peaks of

224 activity (and two troughs) in each circadian cycle. In this special case, the peaks are uniformly

225 separated by 12 hours, but different parameterisations can tune the peak-to-peak distances to be

226 non-uniform (such as we observed experimentally), and even to be so small as to effectively merge

227 the double peak into a single peak.

228 This calculation only demonstrates that the production rate can easily exhibit double peaks. This is a

229 necessary but not sufficient condition to produce double peaks of *expression*. If a double peak in

230 production rate is too subtle, then the double peak will either be obscured or become a shoulder at

231 the expression level, unless the dilution rates and other kinetic parameters are fast enough, or,

232 alternatively, the Hill exponents are raised. These parameters can easily be tuned in the full model

233 (Equations (S3-S5)).

234

235 **2. Relation of oscillatory Hill equation dynamics to models with multiplication of sinusoidal terms.**

236 A non-linear interaction between two or more periodic signals generally introduces second

237 harmonics (Franken et al, 1961; Westermarck & Herzel, 2013). In gene networks, typical sources of

238 non-linearities are cooperative binding and combinatorial regulation (Korenčič et al, 2012;  
 239 Westermark & Herzel, 2013). These mechanisms can be phenomenologically modelled by Hill  
 240 functions and products of input time variables. In the denominator of equation (S7) one finds the  
 241 term  $u_1 \cdot u_2$ , which we can write as a product of two sinusoidal terms (S1), such that

$$242 \quad u_1 \cdot u_2 = \frac{b_1 + \frac{1}{2}(A_1 - b_1) \left(1 + \cos\left(\frac{2\pi t}{24}\right)\right)}{K_{M,1}} \frac{b_2 + \frac{1}{2}(A_2 - b_2) \left(1 + \cos\left(\frac{2\pi t}{24}\right)\right)}{K_{M,2}}. \quad (\text{S12})$$

243 Using the trigonometric identity  $2(\cos(\omega t))^2 = 1 + \cos(2\omega t)$ , (S12) becomes

$$244 \quad u_1 \cdot u_2 = \text{Constant} + \frac{(A_1 A_2 - b_1 b_2)}{2 K_{M,1} K_{M,2}} \cos\left(\frac{2\pi t}{24}\right) + \frac{(A_1 - b_1)(A_2 - b_2)}{8 K_{M,1} K_{M,2}} \cos\left(\frac{2\pi t}{12}\right), \quad (\text{S13})$$

245 where the last term is the second harmonic responsible for frequency doubling.

246 In the general case where the production rate is given by

$$247 \quad f = V \frac{(u_1)^{h_1}}{1 + (u_1)^{h_1} + (u_2)^{h_2} + (u_1)^{h_1} (u_2)^{h_2}}, \quad (\text{S14})$$

248 we can expand each of the input terms  $(u)^h$ , such that

$$249 \quad (u)^h = \sum_{k=0}^h \binom{h}{k} \Gamma^{h-k} z^k \left(\cos\left(\frac{2\pi t}{24}\right)\right)^k, \quad (\text{S15})$$

250 where  $\Gamma = \frac{(A+b)}{2 K_M}$  and  $b = \frac{(A-b)}{2 K_M}$ . The sinusoidal term can be expressed as a combination of

251 harmonics according to the following general trigonometric identity:

$$252 \quad (\cos(\omega t))^k = \begin{cases} \frac{2}{2^k} \sum_{q=0}^{\frac{k-1}{2}} \binom{k}{q} \cos((k-2q)\omega t), & \text{if } k \text{ is odd} \\ \frac{1}{2^k} \binom{k}{\frac{k}{2}} + \frac{2}{2^k} \sum_{q=0}^{\frac{k}{2}-1} \binom{k}{q} \cos((k-2q)\omega t), & \text{if } k \text{ is even} \end{cases}. \quad (\text{S16})$$

253 Discarding all terms beyond the second harmonic, (S15) becomes

$$\begin{aligned}
254 \quad (u)^h &\approx \underbrace{\sum_{k \text{ odd}}^h \binom{h}{k} \left(\frac{k}{2}\right) \Gamma^{h-k} z^k \frac{2}{2^k} \cos\left(\frac{2\pi t}{24}\right)}_s + \underbrace{\sum_{k \text{ even}}^h \binom{h}{k} \left(\frac{k}{2} - 1\right) \Gamma^{h-k} z^k \frac{2}{2^k} \cos\left(\frac{2\pi t}{12}\right)}_r + \\
255 \quad &\underbrace{\sum_{k \text{ even}}^h \binom{h}{k} \left(\frac{k}{2}\right) \Gamma^{h-k} z^k \frac{1}{2^k}}_\varepsilon, \tag{S17}
\end{aligned}$$

256 where  $s$  represents the amplitudes of all 24 hour components,  $r$  represents the amplitudes of all 12  
257 hour components, i.e., the second harmonic, and  $\varepsilon$  is a constant. Replacing into (S14), we can derive  
258 the general form of the production rate in terms of the first and second harmonics:

$$\begin{aligned}
259 \quad f &\approx V \frac{\varepsilon_1 + s_1 \cos\left(\frac{2\pi t}{24}\right) + r_1 \cos\left(\frac{2\pi t}{12}\right)}{1 + \varepsilon_1 + \varepsilon_2 + \varepsilon_1 \varepsilon_2 + \frac{s_1 s_2}{2} + \frac{r_1 r_2}{2} + \left(s_1 + s_2 + \varepsilon_1 s_2 + \varepsilon_2 s_1 + \frac{s_1 r_2}{2} + \frac{s_2 r_1}{2}\right) \cos\left(\frac{2\pi t}{24}\right) + \left(r_1 + r_2 + \varepsilon_1 r_2 + \varepsilon_2 r_1 + \frac{s_1 s_2}{2}\right) \cos\left(\frac{2\pi t}{12}\right)}. \\
260 \quad &\tag{S18}
\end{aligned}$$

261

262

## 263 **References:**

264 Chabot JR, Pedraza JM, Luitel P, van Oudenaarden A (2007) Stochastic gene expression out-of-  
265 steady-state in the cyanobacterial circadian clock. *Nature* **450**: 1249-1252

266

267 Franken P, Hill AE, Peters C, Weinreich G (1961) Generation of optical harmonics. *Phys Rev Lett* **7**:  
268 118-119

269

270 Korenčič A, Bordyugov G, Rozman D, Goličnik M, Herzel H (2012) The interplay of cis-regulatory  
271 elements rules circadian rhythms in mouse liver. *PLoS One* **7**: e46835

272

273 Westermarck PO, Herzel H (2013) Mechanism for 12 hr rhythm generation by the circadian clock. *Cell*  
274 *Rep* **3**: 1228-1238

275

276

277

278
