# Supplementary material for: Frequency doubling in the cyanobacterial circadian clock
Source: PubMed Central journal article supplement (PMC5199125; doi:10.15252/msb.20167087), 2016-12-22
Supplement: MSB-12-896-s010.pdf [file MSB-12-896-s010.pdf]

## Frequency doubling in the cyanobacterial circadian clock

Bruno Martins, Arijit Das, Liliana Antunes and James Locke

*Corresponding author: James Locke, Cambridge University*

---

### Review timeline:

|                     |                  |
|---------------------|------------------|
| Submission date:    | 13 June 2016     |
| Editorial Decision: | 06 July 2016     |
| Revision received:  | 27 October 2016  |
| Editorial Decision: | 16 November 2016 |
| Revision received:  | 17 November 2016 |
| Accepted:           | 23 November 2016 |

---

Editor: Maria Polychronidou

### Transaction Report:

(Note: With the exception of the correction of typographical or spelling errors that could be a source of ambiguity, letters and reports are not edited. The original formatting of letters and referee reports may not be reflected in this compilation.)

1st Editorial Decision

06 July 2016

---

Thank you again for submitting your work to Molecular Systems Biology. We have now heard back from the three referees who agreed to evaluate your study. As you will see below, the reviewers acknowledge that the presented findings are interesting. However, they raise a number of concerns, which should be carefully addressed in a revision of the manuscript. The recommendations of the referees are clear, so there is no need to repeat the points listed below.

-----

### REFeree REPORTS

#### Reviewer #1:

In this manuscript Martins, Das and Locke use YFP reporters and microscopy and to examine the nature of psbAI (paralogs should be roman) expression in single *Synechococcus elongatus* cells. They find that psbAI expression exhibits two peaks of gene expression at very low light that is dependent on both sigC and the circadian clock (both of which have been previously demonstrated to be required for proper expression of psbAI at the population level). These results were dependent on single cell analysis as averaging effects appear to mask this effect. Furthermore they demonstrate that rpoD6, a group 2 sigma factor, also displays a similar 2 peak expression pattern over a 24-h cycle, suggesting that 2 peaks of expression may be a more generalized mechanism. The authors also demonstrate that *S. elongatus* exhibits 2 peaks in cell elongation and try to make a correlation with psbA1 expression. Combined with mathematical modeling the authors put forward a model suggesting that the two peak oscillation are driven by an incoherent feedforward loop where the circadian clock activates both sigC and psbA1 and sigC in turn inhibits psbAI generating two peak oscillations in every 24-h cycle. While these data are interesting and shed light into how the circadian outputs can be modulated to generate rhythms of different periodicities there are some concerns regarding some of the data interpretation.

1. In particular there were several points of inconsistency regard the sigC results:
  - a. It was unclear how the traces in Figure 3 were generated for the P<sub>sigC</sub>-YFP reporter. Movie 2, which showed these strains growing displayed a great deal of cell to cell variation. It was unclear as to how such variation observed in the movie resulted in the coherent and large amplitude rhythms shown in Fig. 3.
  - b. The authors show that psbAI rhythms in a sigC mutant background have a single peak of expression with a 24h period oscillation. However published results (Nair et al., 2002) show period lengthening. Can the authors explain this discrepancy?
  - c. There also appeared to be some confusion about the role for SigC in their model. In particular the authors mention in lines 178-181 that the SigC auto-regulatory feedback was not necessary to observe the two peak oscillation. However, their data (Figure 1D) suggests that sigC is absolutely necessary for this observation. How are these reconciled?
2. Additionally, the authors claim that psbAI levels can account for the 2 peaks in cell elongation. However, *S. elongatus* displays what is known as circadian gating of cell division, where the circadian clock specifically inhibits cell division for several hours around subjective dusk. Could the observed 2-peaks in cell elongation be due to circadian gating of cell division? Is this two peak in elongation rate observed in a kai mutant background?
3. The authors do not mention the fact that the O'Shea lab found the sigC gene to be a direct target of RpaA, which is the transcriptional master regulator by which the Kai oscillator controls gene expression. With this point in mind, can the authors be more specific about how the two loops interact?
4. Although not essential for this paper, it would have been useful to also test expression of a gene not known to be strongly affected by sigC or by environmental conditions, such as the kaiBC promoter. Data may be available that could be incorporated in the model. See:

Stability and lability of circadian period of gene expression in the cyanobacterium *Synechococcus elongatus*. Clerico EM, Cassone VM, Golden SS. *Microbiology*. 2009 Feb;155(Pt 2):635-41. doi: 10.1099/mic.0.022343-0. PMID: 19202112

#### Reviewer #2:

This is an interesting paper that seeks to explain how the circadian clock in the cyanobacterium *Synechococcus elongatus*, which beats on a 24 h basis, is also able to generate shorter period (12 h) rhythms by frequency doubling.

The authors created a transgenic strain that expresses YFP under the control of the psbA1 promoter, a key gene involved in photosynthesis, which has been used as a circadian marker in many guises before, mostly using bioluminescence. However, previous analyses have employed population assessment of bacterial psbA1 expression, rather than single cell analyses, and therefore have not revealed 12 h oscillations previously. The paper presents compelling data, by genetic deletion, that an important component mediating frequency doubling of psbA1 is the sigC sigma factor.

Conceptually, the paper presents a new model of how frequency doubling can occur in this particular case (and is modeled well by an incoherent feedforward loop), but also potentially in other genetic circuits (e.g. mammalian clock). Therefore, the study will be of interest to researchers interested in oscillatory phenomena, including those studying circadian clocks in many organisms.

#### Major points

1. The authors should discuss, and justify, why previous bioluminescence studies performed using single cell imaging (e.g. Mihalcescu et al. *Nature* 2004) did not observe 12 hour rhythms, even though psbA1 drove expression of bacterial luciferase in these cells.
2. Related to (1), the authors should exclude a significant effect of pH in determining the phenomenon they observe. YFP fluorescence is known to be significantly affected by pH. If, for example, sigC drives a 24 h rhythm in pH (that was independent of the psbA1 rhythm), this could produce a second peak in fluorescent that was not due to psbA1 at all. One way to resolve this might be to express YFP under a constitutive promoter and see whether YFP fluorescence oscillates. An alternative would be to assay YFP protein / transcript levels (or psbA1 itself) in synchronized psbA1-YFP cells. It would be expected that if 12 h and 24 h rhythms are driven by the psbA1

promoter, then this should be seen in expression patterns, in addition to YFP fluorescence.

Minor points

1. Does fluorescence excitation itself affect the clock in the cyanobacterial cells? This is important since light levels influence the phenomena shown in the manuscript. Citing previous literature would be sufficient, if available.
2. "Dampen" means "to wet". This should be changed to "damp".

### Reviewer #3:

The manuscript combines in a convincing way large scale single cell imaging, appropriate reporters and mutations, network motifs and mathematical modeling. The key observations are frequency doublings (or harmonics) related to the circadian clock. In the introduction other interesting biological examples are discussed with 12 hour rhythms including circa-tidal rhythms. Thus the harmonics generation is of broad interest in biology.

The manuscript is clearly written and the Figures and statistical analyses are described appropriately. The graphical presentations include convincing single cell examples and, more importantly, large scale statistics (histograms and correlations for many cells). The data are directly exploited to design a heuristic model with an incoherent feedforward loop and self-inhibition. Model simulations are consistent with the intuitive interpretation of the described combinatorial regulation. The study of another reporter in Figure 6 illustrates the generality of the underlying principle.

Minor comments:

1. The final sentence of the introduction is correct but a bit mystic ("couple to multiple downstream gene circuits ...complex and unexpected gene regulation."). I am sure that the authors are aware that harmonics generation is a well-studied phenomenon in laser physics requiring simply non-linearities and high intensities. In the supplement the authors illustrate themselves that frequency doubling is even possible with Michaelis-Menten kinetics. Thus I suggest to state more clearly that multiplications of periodic signals of comparable amplitudes and appropriate phases generate harmonics (see, e.g. a supplement in Korencic PLoS One 2012). Furthermore, it might be demonstrated in the supplement more clearly how non-linearities such as Hill functions can be related to multiplications of trigonometric terms. Perhaps even the effects of high light intensities can be interpreted in that framework easily: One of the trigonometric terms dominates the other and removes frequency doubling.
2. I find "3 days of movies (10 movies in total)" confusing. The data shown in Figure 1A are 5 days long. What is the meaning of "3 days"?
3. The messages from Figure 2 are very clear but some technical aspects are unclear to me. Normally, auto-correlations are based on long-term time averages. Here only a few days are available? Thus I expect some other averages over ensembles of cells and movies. Even from the supplement I got no complete understanding. Why auto-correlations are below 1? How error bars are calculated?
4. It is a pity that even in MSB equations are omitted in the main text. I see from the supplement that a full explanation of all terms and parameters is too much but perhaps an abbreviated example of these 3 equations might be included in the main text to illustrate that the model is indeed straightforward and relatively simple.
5. Why relatively large Hill coefficients are chosen? What is the minimal Hill coefficient to get frequency doubling?

## **Response to Reviewer #1:**

*“In this manuscript Martins, Das and Locke use YFP reporters and microscopy and to examine the nature of psbAI (paralogs should be roman) expression in single Synechococcus elongatus cells “*

We thank the reviewer for pointing this out and we have modified our nomenclature accordingly.

*“They find that psbAI expression exhibits two peaks of gene expression at very low light that is dependent on both sigC and the circadian clock (both of which have been previously demonstrated to be required for proper expression of psbAI at the population level). These results were dependent on single cell analysis as averaging effects appear to mask this effect. Furthermore they demonstrate that rpoD6, a group 2 sigma factor, also displays a similar 2 peak expression pattern over a 24-h cycle, suggesting that 2 peaks of expression may be a more generalized mechanism. The authors also demonstrate that S. elongatus exhibits 2 peaks in cell elongation and try to make a correlation with psbA1 expression. Combined with mathematical modeling the authors put forward a model suggesting that the two peak oscillation are driven by an incoherent feedforward loop where the circadian clock activates both sigC and psbA1 and sigC in turn inhibits psbAI generating two peak oscillations in every 24-h cycle. While these data are interesting and shed light into how the circadian outputs can be modulated to generate rhythms of different periodicities there are some concerns regarding some of the data interpretation.”*

We thank the reviewer for their interest in our study. We have modified the text and produced new figures to clarify our interpretation of the data, as described below.

*“1. In particular there were several points of inconsistency regard the sigC results:*

*a. It was unclear how the traces in Figure 3 were generated for the P<sub>sigC</sub>-YFP reporter. Movie 2, which showed these strains growing displayed a great deal of cell to cell variation. It was unclear as to how such variation observed in the movie resulted in the coherent and large amplitude rhythms shown in Fig. 3.”*

In this and other similar figures, we plotted a mean trace across all single cells in all experiments (the dashed line) and two illustrative single cell traces from any of a number of micro-colonies (movies). We agree with the reviewer that the amplitude of the two traces we plot may not be representative of the variance in the distribution of maximal amplitudes (which is depicted in Figure EV2A, red histogram). We redrew Figure EV2 to measure the amplitudes in the same way as in Figure 1F. We chose a different example for one of the representative traces in Figure 3A, which is now shown in the figure.

The single cell time traces of Movie 2 are shown below for a little over 4 days (we did not analyse this movie any further). While the reviewer is right to point out that there is a degree of cell-to-cell variability, we do not think it paints a different picture to what we summarise in Figure 3. We have now included the traces from this and another independent movie in a new supplemental figure

(Figure S2). We hope that this new figure, in addition to the existing figure showing the distribution of amplitudes (Figure EV2A), as well as the modification to Figure 3A, will allow the reader to gain an accurate impression of the coherence of the  $P_{sigC}$ -YFP rhythms.

Data removed at authors' request

*“b. The authors show that  $psbAI$  rhythms in a  $sigC$  mutant background have a single peak of expression with a 24h period oscillation. However published results (Nair et al., 2002) show period lengthening. Can the authors explain this discrepancy?”*

The reviewer is correct we did not comment on the period lengthening results of Nair et al., 2002. These researchers found  $sigC$  deletions increased the period of  $P_{psbAI}::luxAB$  expression by about 2 hours. To investigate whether we also observed period lengthening in the  $sigC$  deletion, we examined the peak to peak distances of the single frequency mode of  $P_{psbAI}$ -YFP (Figure 1B) and  $P_{sigC}$ -YFP (Figure 3B). We observe a small increase in period in the  $sigC$  mutants. For  $P_{sigC}$ -YFP, for example, we can measure a mean peak-to-peak distance of 24.43 hours in the WT, while in the  $sigC$  mutant, we measure a distance of 25.47 hours.

We now discuss this fact, and a comparison to the Nair et al. 2002 results in the discussion (lines 310-315 in the Discussion). We suggest that in future work it will be important to examine the mode of action of possible extra components in the circuit (lines 320-322 in the Discussion). We point out that these extra components will not affect the mechanism of frequency doubling we present in this paper. The incoherent feedforward loop will still be embedded in the circuit and drive two peak oscillations.

*“c. There also appeared to be some confusion about the role for SigC in their model. In particular the authors mention in lines 178-181 that the SigC auto-regulatory feedback was not necessary to observe the two peak oscillation. However, their data (Figure 1D) suggests that  $sigC$  is absolutely necessary for this observation. How are these reconciled?”*

We apologise for the potentially ambiguous wording of our statement in lines 178-181 (of the previous version). The negative regulation of SigC in the system has two arms: negative feedback on itself and feedforward on  $psbAI$ . We mean to say that, *mathematically*, it is only the negative regulation of SigC on *itself* that is not necessary to generate two peak oscillations in  $psbAI$ . In our model, what is absolutely necessary to generate a two-peak oscillation is the feedforward of SigC on  $psbAI$ . Simulations of a  $sigC$  deletion are plotted in Figure 4A and are in good agreement to the experimental results of Figure 1D.

We have clarified this sentence in the text (lines 199-201 in the Results section) to make it clearer to the reader.

*“2. Additionally, the authors claim that  $psbAI$  levels can account for the 2 peaks in cell elongation. However, *S. elongatus* displays what is known as circadian gating of cell division, where the circadian clock specifically inhibits cell division for several hours around subjective dusk. Could the observed 2-*

*peaks in cell elongation be due to circadian gating of cell division?” “Is this two peak in elongation rate observed in a kai mutant background?”*

We thank the reviewer for noting a possible confusing element of our growth (elongation) rate measurement. We have modified the relevant section in the Materials and Methods (lines 429-430) to clarify our elongation rate measurement. We calculated the elongation rate by averaging over a sliding window at each time point. We concatenated the length time traces of cells to the traces of their mothers and daughters. In this way we can average *across* division events and obtain a continuous function for the elongation rate, which is not interrupted at the end of each cell cycle. On the other hand, as the reviewer described, gating of cell division refers to the modulation of the rate (or probability) of cell division, which fluctuates with a circadian period. While a delay (gating) in cell division will temporarily stall the birth of new cells, it does not stop cells from increasing in length. In addition to the fact that our growth rate calculations take into account division, we also observe a similar distribution of cell cycle times in the wild-type and sigC deletion mutants. Thus the gating of cell division does not appear to play a role in the two peaks of elongation that we observe.

A hallmark of gating, under certain light levels, is a bimodal distribution of cell cycle times, where one mode corresponds to the cells for which cell division was inhibited around subjective dusk (longer cell cycles) and the other mode corresponds to cells for which cell division was not inhibited (shorter cell cycles). We observe similar gating of cell division between the WT (which shows 2 peaks of elongation rate) and the sigC knock-out (which shows one), as displayed in the figure below. Hence we do not think that cell cycle gating is playing a role in our observed two peak oscillation in elongation rate.

Data removed at authors' request

*“Is this two peak in elongation rate observed in a kai mutant background?”*

We do not observe secondary peaks in the autocorrelation of growth in the KaiBC mutant background (see figure below). This is to be expected from our model as without the circadian clock there is no 12 or 24 hour oscillation in psbAI or other clock outputs.

Data removed at authors' request

With the reviewer's permission, we would prefer not to add these results to our manuscript, as we are preparing a different manuscript where we examine growth rates and cell division gating in greater detail, and would prefer to keep the two manuscripts separate.

*“3. The authors do not mention the fact that the O'Shea lab found the sigC gene to be a direct target of RpaA, which is the transcriptional master regulator by which the Kai oscillator controls gene expression. With this point in mind, can the authors be more specific about how the two loops interact?”*

We agree with the reviewer that this is an interesting and important point. We now discuss implications of those results in the text (lines 317-320 in the Discussion).

*“4. Although not essential for this paper, it would have been useful to also test expression of a gene not known to be strongly affected by sigC or by environmental conditions, such as the kaiBC promoter. Data may be available that could be incorporated in the model. See:*

*Stability and lability of circadian period of gene expression in the cyanobacterium Synechococcus elongatus.*

*Clerico EM, Cassone VM, Golden SS.*

*Microbiology. 2009 Feb;155(Pt 2):635-41. doi: 10.1099/mic.0.022343-0.*

*PMID: 19202112”*

We thank the reviewer for this suggestion. We added a discussion on the results of this paper and agree it will be an important factor to keep in mind going forward (lines 315-317 and 320-322 in the Discussion). In addition, please see below, in our response to major point 2 by reviewer #2, examples of times traces of PkaiBC-YFP from new experiments we carried out.

### **Response to Reviewer #2:**

*“This is an interesting paper that seeks to explain how the circadian clock in the cyanobacterium Synechococcus elongatus, which beats on a 24 h basis, is also able to generate shorter period (12 h) rhythms by frequency doubling.*

*The authors created a transgenic strain that expresses YFP under the control of the psbA1 promoter, a key gene involved in photosynthesis, which has been used as a circadian marker in many guises before, mostly using bioluminescence. However, previous analyses have employed population assessment of bacterial psbA1 expression, rather than single cell analyses, and therefore have not revealed 12 h oscillations previously. The paper presents compelling data, by genetic deletion, that an important component mediating frequency doubling of psbA1 is the sigC sigma factor.*

*Conceptually, the paper presents a new model of how frequency doubling can occur in this particular case (and is modeled well by an incoherent feedforward loop), but also potentially in other genetic circuits (e.g. mammalian clock). Therefore, the study will be of interest to researchers interested in oscillatory phenomena, including those studying circadian clocks in many organisms.”*

We thank the reviewer for their interest in our study and we are glad to find the reviewer finds our work will be of general interest.

*“Major points*

*1. The authors should discuss, and justify, why previous bioluminescence studies performed using*

*single cell imaging (e.g. Mihalcescu et al. Nature 2004) did not observe 12 hour rhythms, even though psbA1 drove expression of bacterial luciferase in these cells. “*

We have added some lines discussing this mismatch in the main text (lines 271-276 in the Discussion). We believe that the key difference is the difference in light levels between the studies. Mihalcescu *et al.*, for example, report  $100 \mu\text{E m}^{-2} \text{s}^{-1}$ . We observe the two-peak phenomenon at  $15 \mu\text{E m}^{-2} \text{s}^{-1}$ , while at  $35 \mu\text{E m}^{-2} \text{s}^{-1}$  it is largely absent. Previous studies may have therefore been conducted outside the light range where the phenomenon occurs. However, inconsistencies in measuring light at the level of the sample plane are likely to exist between different studies, so we cannot say for sure that these light levels are directly comparable. Indeed, Mihalcescu *et al.* measured an average colony doubling time of 23 h, which is of the same order of the growth rates we measured in our experiments, suggesting the “real” light levels (i.e., the flux of photons actually reaching the cells) in the two studies are closer. However, in order to measure the luminescence from the luciferase reporter Mihalcescu *et al.* had to turn the lights off for 35 minutes in between each time point sample, and so illumination was intermittently off for approximately 1/3 of the experiment (8 hours in a day). In fact, this may be the reason why their growth rates and ours are effectively similar: their cells would have grown faster when the lights are on (at high intensity), but slow down when the lights are off. By contrast, one advantage of using YFP rather than luciferase is that it means our acquisition times are much shorter (less than 5 seconds per timepoint rather than 35 minutes for luciferase). We only switch the lights off when acquiring images (turning them on when the stage travels between positions and during automatic focusing), which means lights are off for less than 3 minutes per day. The illumination conditions are therefore significantly different. Since the behaviour we observed is light-dependent, and Mihalcescu *et al.*'s cells were under a different light regime, we believe that this is the main reason why frequency doubling was not observed in their study.

*“2. Related to (1), the authors should exclude a significant effect of pH in determining the phenomenon they observe. YFP fluorescence is known to be significantly affected by pH. If, for example, sigC drives a 24 h rhythm in pH (that was independent of the psbA1 rhythm), this could produce a second peak in fluorescent that was not due to psbA1 at all. One way to resolve this might be to express YFP under a constitutive promoter and see whether YFP fluorescence oscillates. An alternative would be to assay YFP protein / transcript levels (or psbA1 itself) in synchronized psbA1-YFP cells. It would be expected that if 12 h and 24 h rhythms are driven by the psbA1 promoter, then this should be seen in expression patterns, in addition to YFP fluorescence. “*

If the YFP fluorescence was affected by an oscillation in pH caused by sigC we would expect to observe double peaks in fluorescence in all traces of reporters in the WT background. In the paper we already analyse P*sigC*-YFP traces in the WT background. These traces display a single peaked 24 hour period, showing evidence that the two peak phenomenon is not due to pH. However, we agree with the reviewer that this is an important point, so we carried out additional movies of circadian reporters to confirm that the two peaks are not due to an oscillation in pH. It is not straightforward to define constitutive reporters in *S. elongatus*. Owing to global circadian regulation in this organism, which ultimately drives circadian cycles of DNA supercoiling (see, for example, Smith and Williams (PNAS 2006), *Circadian rhythms in gene transcription imparted by chromosome compaction in the*



*cyanobacterium Synechococcus elongatus*; Woelfle et al. (PNAS 2007), *Circadian rhythms of superhelical status of DNA in cyanobacteria*; Vijayan et al. (PNAS 2012), *Oscillations in supercoiling drive circadian gene expression in cyanobacteria*) it is unlikely any promoter will have a truly flat mean fluorescence (Liu et al. (Genes Dev 1995), *Circadian orchestration of gene expression in cyanobacteria*).

Instead, we examined fluorescent reporters for the housekeeping sigma factor *rpoD1* and for the *kaiBC* operon (using a published strain from Chabot and van Oudenaarden, Nature 2007), which are not known to be regulated by *sigC*. If there was a large enough oscillation in pH in the system affecting YFP fluorescence, we would expect to see evidence of two peak oscillations in the *PkaiBC*-YFP and *PrpoD1*-YFP reporter. Below, we plot all single cell traces for three movies of representative colonies of these two reporters. The black trace represents the mean across all cells in the colony. We do not see double peaks in fluorescence in either case. For comparison, we show three representative movies of *psbAI* under the same conditions (two of which we had use in Figure EV1 as examples of synchronised and desynchronised double peaks across the whole colony). In addition to these, and as we mentioned before, we point out that we did not observe double peaks in the *sigC* reporter either (Figure 3, Figure S2).

Data removed at authors' request

#### *“Minor points*

*1. Does fluorescence excitation itself affect the clock in the cyanobacterial cells? This is important since light levels influence the phenomena shown in the manuscript. Citing previous literature would be sufficient, if available. “*

Fluorescence microscopy of the clock in cyanobacteria is an established technique, with reviews available describing best practice in order to avoid perturbation of the clock (e.g, Cohen SE et al., Methods Enzymology, 2015; Yokoo et al., Photosynthetic Research, 2015). We have now added references to the Materials and Methods section, with a description of how we are following best practice in the field (lines 387-390). These include avoiding fluorescent proteins in the blue regime, minimising exposure times, and spacing timepoints atleast 30 minutes apart (Yokoo et al., Photosynthetic Research, 2015).

*“2. “Dampen” means “to wet”. This should be changed to “damp”.“*

We thank the reviewer for this correction. Indeed, “to dampen” means “to wet”, but it also has the additional meaning of “to depress” or “to make less strong”, which was the intended meaning. However, it is true that “damp” is a more standard term in oscillatory mechanics, so we have changed our text accordingly (lines 172 in Results).

#### **Response to reviewer #3:**

*“The manuscript combines in a convincing way large scale single cell imaging, appropriate reporters and mutations, network motifs and mathematical modeling. The key observations are frequency doublings (or harmonics) related to the circadian clock. In the introduction other interesting biological examples are discussed with 12 hour rhythms including circa-tidal rhythms. Thus the harmonics generation is of broad interest in biology.*

*The manuscript is clearly written and the Figures and statistical analyses are described appropriately. The graphical presentations include convincing single cell examples and, more importantly, large scale statistics (histograms and correlations for many cells). The data are directly exploited to design a heuristic model with an incoherent feedforward loop and self-inhibition. Model simulations are consistent with the intuitive interpretation of the described combinatorial regulation. The study of another reporter in Figure 6 illustrates the generality of the underlying principle.”*

We thank the reviewer for their interest and positive words about our study.

*“Minor comments:*

*1. The final sentence of the introduction is correct but a bit mystic (“couple to multiple downstream gene circuits ...complex and unexpected gene regulation.”). I am sure that the authors are aware that harmonics generation is a well-studied phenomenon in laser physics requiring simply non-linearities and high intensities. In the supplement the authors illustrate themselves that frequency doubling is even possible with Michaelis-Menten kinetics. Thus I suggest to state more clearly that multiplications of periodic signals of comparable amplitudes and appropriate phases generate harmonics (see, e.g. a supplement in Korencic PLoS One 2012). “*

We thank the reviewer for pointing out the generality of frequency doubling in other fields. We added a sentence on the multiplication of sinusoidal factors to the introduction where we now reference Korencic *et al.*, *PLoS One* 2012 (lines 49-51). We have also deleted the adjective unexpected from the last sentence of the introduction (line 91).

*“Furthermore, it might be demonstrated in the supplement more clearly how non-linearities such as Hill functions can be related to multiplications of trigonometric terms. Perhaps even the effects of high light intensities can be interpreted in that framework easily: One of the trigonometric terms dominates the other and removes frequency doubling.”*

We agree with the reviewer that it is a good idea to show the reciprocity between our model functions and previous work on second harmonics arising from multiplications of trigonometric terms. We added a new sub-section (Section III.2) to the Appendix supplement. In it, we derive and present a general form for the decomposition of two-input Hill functions (where the inputs are sinusoids) into a combination of first and second harmonic terms.

*“2. I find “3 days of movies (10 movies in total)” confusing. The data shown in Figure 1A are 5 days long. What is the meaning of “3 days”?”*

We agree with the reviewer that our wording is unclear. By “3 days of movies” we meant to say 3 independent experiments (started at 3 different days from 3 different cell cultures). From these we analysed 10 movies (10 micro-colonies). We modified the way this information is presented in the text (line 103 in Results).

*“3. The messages from Figure 2 are very clear but some technical aspects are unclear to me. Normally, auto-correlations are based on long-term time averages. Here only a few days are available? Thus I expect some other averages over ensembles of cells and movies. Even from the supplement I got no complete understanding.”*

We agree with the reviewer that the technical details on the cross-correlations can be made clearer. As mentioned in the Materials and Methods (line 434), we followed the method introduced by Dunlop et al. (Nat Gen, 2008) to compute cross-correlations on time series in tree structures. Equation (7) computes the cross-correlation function in a *micro-colony* (movie), in which cells branch out of each other – in a lineage tree – from a single founder.

In a first step, all  $N_c$  lineages in the tree are extracted, typically one for each cell present at the end of the movie. One therefore obtains  $N_c$  time series and calculates the cross-correlation between a pair of variables in each of these lineages in the usual way, i.e., for each time lag, one computes  $\sum_{\text{all data points}} x(n + \tau)y(n)$ . Secondly, all cross-correlations thus obtained are averaged across all cells/lineages. However, because in a tree structure many pairs of data points are common to more than one lineage, the contributions of repeated pairs of data points are subtracted to ensure each pair is only counted once, hence the negative term in equation (7). Finally, for each strain, we average the cross-correlations across all movies (where one movie tracks one tree), and that final average is what is plotted in the panels of Figure 2.

We have rewritten the relevant section in the Materials and Methods (lines 434-455) to include more details and a clearer rationale.

*“Why auto-correlations are below 1? How error bars are calculated?”*

The reviewer is right to be confused about the maximal value of the auto-correlation not averaging to 1. It should be 1. We originally made a mistake where, when averaging across all movies, divided by the incorrect number of movies in the denominator. We apologise for this mistake, but fortunately it only introduces a scaling error, which does not affect the shape of the cross-correlation profiles and their underlying message. We thank the reviewer for this observation, and we have corrected the figure accordingly.

The error bars represent standard errors of the mean, where the number of movies is the number of samples. This is mentioned in the figure legend (lines 690-691).

*“4. It is a pity that even in MSB equations are omitted in the main text. I see from the supplement that a full explanation of all terms and parameters is too much but perhaps an abbreviated example of these 3 equations might be included in the main text to illustrate that the model is indeed straightforward and relatively simple. “*

We agree with the reviewer’s suggestion and have now added a simplified version of the model equations to the main text (lines 185-194 in Results).

*“5. Why relatively large Hill coefficients are chosen? What is the minimal Hill coefficient to get frequency doubling? “*

The simulations shown in Figure 4 are meant to be an illustration of the dynamical output of the model in comparison to the observed expression data, not a best fit of the data. As such, the parameters are somewhat arbitrary. The reviewer is, of course, correct to draw attention to the Hill coefficients because these generate further multiplications of periodic terms. As the reviewer pointed out above, such terms are critical in generating and modulating the amplitude of double frequency harmonics. As such, higher Hill coefficients can generally be expected to either generate double peaks of higher prominence or expand the parameter space where they are found. In order to explore how frequency doubling is affected by the Hill coefficient choice, we used equation (S14),  $f = V \frac{(u_1)^{h_1}}{1+(u_1)^{h_1}+(u_2)^{h_2}+(u_1)^{h_1} (u_2)^{h_2}}$ , to calculate the production rate of a target regulated by two sinusoidal inputs. We sampled 100,000 sets of parameters from uniform distributions and determined whether the production rate was two peaked or single peaked. Finally, if two peaked, we calculated the relative prominences (vertical distance between the top of the peak and its base) of the two peaks. The product of the two prominences is therefore a proxy for the “strength” of the frequency doubling. The distribution of Hill coefficients in sets where the product of relative prominences is greater than 0.04 (in Figure 4B, the equivalent product is 0.042) is shown below (panel A). Clearly, higher Hill coefficients are favoured, as one would intuitively expect, but combinations with lower Hill coefficients are not prohibited. Below, in panel B, we present a comparison between the simulation with the full model shown in Figure 4B and a simulation for the same set of parameters, but where the Hill coefficients of 5 were reduced to 3. We can include these panels in the Appendix supplement, if the reviewer feels they will enhance it.

In the Appendix, we show that frequency doubling is detectable in the production rate of a deterministic system even if the Hill coefficients are chosen to be 1 (because in our model, there is competition between the two regulators, which yields a term that expresses the product of the two). However, in order for frequency doubling in the production rate to be detectable at the level of expression when the Hill coefficients are low, fast dilution-degradation rates are required.

Data removed at authors’ request

*“3. The messages from Figure 2 are very clear but some technical aspects are unclear to me. Normally, auto-correlations are based on long-term time averages. Here only a few days are available? Thus I expect some other averages over ensembles of cells and movies. Even from the supplement I got no complete understanding.”*

We agree with the reviewer that the technical details on the cross-correlations can be made clearer. As mentioned in the Materials and Methods (line 434), we followed the method introduced by Dunlop et al. (Nat Gen, 2008) to compute cross-correlations on time series in tree structures. Equation (7) computes the cross-correlation function in a *micro-colony* (movie), in which cells branch out of each other – in a lineage tree – from a single founder.

In a first step, all  $N_c$  lineages in the tree are extracted, typically one for each cell present at the end of the movie. One therefore obtains  $N_c$  time series and calculates the cross-correlation between a pair of variables in each of these lineages in the usual way, i.e., for each time lag, one computes  $\sum_{\text{all data points}} x(n + \tau)y(n)$ . Secondly, all cross-correlations thus obtained are averaged across all cells/lineages. However, because in a tree structure many pairs of data points are common to more than one lineage, the contributions of repeated pairs of data points are subtracted to ensure each pair is only counted once, hence the negative term in equation (7). Finally, for each strain, we average the cross-correlations across all movies (where one movie tracks one tree), and that final average is what is plotted in the panels of Figure 2.

We have rewritten the relevant section in the Materials and Methods (lines 434-455) to include more details and a clearer rationale.

*“Why auto-correlations are below 1? How error bars are calculated?”*

The reviewer is right to be confused about the maximal value of the auto-correlation not averaging to 1. It should be 1. We originally made a mistake where, when averaging across all movies, divided by the incorrect number of movies in the denominator. We apologise for this mistake, but fortunately it only introduces a scaling error, which does not affect the shape of the cross-correlation profiles and their underlying message. We thank the reviewer for this observation, and we have corrected the figure accordingly.

The error bars represent standard errors of the mean, where the number of movies is the number of samples. This is mentioned in the figure legend (lines 690-691).

*“4. It is a pity that even in MSB equations are omitted in the main text. I see from the supplement that a full explanation of all terms and parameters is too much but perhaps an abbreviated example of these 3 equations might be included in the main text to illustrate that the model is indeed straightforward and relatively simple.”*

We agree with the reviewer’s suggestion and have now added a simplified version of the model equations to the main text (lines 185-194 in Results).

*“5. Why relatively large Hill coefficients are chosen? What is the minimal Hill coefficient to get frequency doubling? ”*

The simulations shown in Figure 4 are meant to be an illustration of the dynamical output of the model in comparison to the observed expression data, not a best fit of the data. As such, the parameters are somewhat arbitrary. The reviewer is, of course, correct to draw attention to the Hill coefficients because these generate further multiplications of periodic terms. As the reviewer pointed out above, such terms are critical in generating and modulating the amplitude of double frequency harmonics. As such, higher Hill coefficients can generally be expected to either generate double peaks of higher prominence or expand the parameter space where they are found. In order to explore how frequency doubling is affected by the Hill coefficient choice, we used equation (S14),  $f = V \frac{(u_1)^{h_1}}{1+(u_1)^{h_1}+(u_2)^{h_2}+(u_1)^{h_1}(u_2)^{h_2}}$ , to calculate the production rate of a target regulated by two sinusoidal inputs. We sampled 100,000 sets of parameters from uniform distributions and determined whether the production rate was two peaked or single peaked. Finally, if two peaked, we calculated the relative prominences (vertical distance between the top of the peak and its base) of the two peaks. The product of the two prominences is therefore a proxy for the “strength” of the frequency doubling. The distribution of Hill coefficients in sets where the product of relative prominences is greater than 0.04 (in Figure 4B, the equivalent product is 0.042) is shown below (panel A). Clearly, higher Hill coefficients are favoured, as one would intuitively expect, but combinations with lower Hill coefficients are not prohibited. Below, in panel B, we present a comparison between the simulation with the full model shown in Figure 4B and a simulation for the same set of parameters, but where the Hill coefficients of 5 were reduced to 3. We can include these panels in the Appendix supplement, if the reviewer feels they will enhance it.

In the Appendix, we show that frequency doubling is detectable in the production rate of a deterministic system even if the Hill coefficients are chosen to be 1 (because in our model, there is competition between the two regulators, which yields a term that expresses the product of the two). However, in order for frequency doubling in the production rate to be detectable at the level of expression when the Hill coefficients are low, fast dilution-degradation rates are required. Data.removed.at.authors'.request.

Thank you for submitting your revised study. We have now heard back from the three referees who were asked to evaluate your manuscript. As you will see below, the referees think that all issues have been satisfactorily addressed and they support publication of the study. Before we formally accept the study for publication, we would ask you to address some minor editorial issues listed below.

We have recently implemented a "model curation service" for papers that contain mathematical models. This is done together with Prof. Jacky Snoep and the FAIRDOM team. In brief, the aim is to enhance reproducibility and add value to papers containing mathematical models. As you will see in the Model Curation Report (pasted below the referee reports) there are some minor issues, which we would ask you to fix when you submit your revised manuscript.

---

#### REFeree REPORTS

Reviewer #1:

The authors have addressed our concerns in the revised manuscript.

Reviewer #2:

This revised manuscript addresses all of the points raised previously both with experimental data and clarifications in the text.

Reviewer #3:

The authors revised the manuscript carefully and answered all my mainly technical concerns appropriately.

---

#### MODEL CURATION REPORT

The model file for MSB-16-7087R was provided in SBML format, and described the model in rate-laws. The model file is correct SBML and could be directly simulated. For inclusion in the JWS Online database, we converted the model from the rate-law description into a process description (i.e. the ODEs are split up in production and consumption processes). This was done to be able to make a schema for the model structure lay-out in the simulator.

I tested the reproduction of the simulation shown in the manuscript: i.e. Fig. 4B, Fig. 6C and Fig 6D. For each of the figures the authors provided the specific simulation settings in the supplementary materials. Most of the simulations could be reproduced, but there are still a number of small issues that need to be addressed.

The authors did not list the initial conditions for any of the simulations. I ran the simulations with initial conditions for all variables equal to 0. This leads to differences in published simulation results compared to the results shown on JWS Online. I see that the authors chose the initial conditions such that they fall on the limit cycle. If the authors supply the initial conditions in the supplementary material, then the models simulations can be made to more precisely reproduce the simulations in the manuscript.

Fig 4b and 6c could be reproduced.

For the output insert shown in Fig 6d, we could reproduce the panels b,c,d but not panel a. I suspect that the value for  $m$  (listed in supplementary material as 0.08) is wrong. When I simulate the model with  $m=0.8$  the simulation result is much closer to what is shown in Fig. 6D.

Please check, and correct the parameter values for the reproduction of the first output signal shown in Fig 6d (panel a in supplementary material; lines 182-183).

Fig EV3 A could be reproduced, although it appears that there is a shift in y-axis. Please check your simulations against the results in JWS Online (see below). For the simulations I only change the parameter kb from 0.1 to 10 (all other parameter values have default values).

Fig EV3 B could not be reproduced. For the simulation I only change the parameter Tc to 9.3 (all other parameter values have default values). Please specify how Figure EV3B was produced, i.e. specify what model variables correspond to the SigC low light and SigC high light lines. Please specify the parameters that were changed compared to the default model (if anything more than parameter Ty).

2nd Revision - authors' response

17 November 2016

Thank you for your positive assessment of our manuscript. Below we address the final editorial and modelling issues that you have brought to our attention.

*“The authors did not list the initial conditions for any of the simulations. I ran the simulations with initial conditions for all variables equal to 0. This leads to differences in published simulation results compared to the results shown on JWS Online. I see that the authors chose the initial conditions such that they fall on the limit cycle. If the authors supply the initial conditions in the supplementary material, then the models simulations can be made to more precisely reproduce the simulations in the manuscript.”*

Prof. Snoep is correct in that we should have specified initial conditions. Our initial conditions are 0 for all species in all figures, but we extracted and show only the final 120 h of a much longer simulation (typically, 600 h although steady state is reached much earlier, after just one or two cycles). This information is now explicitly stated in the model section in the Appendix.

*“For the output insert shown in Fig 6d, we could reproduce the panels b,c,d but not panel a. I suspect that the value for m (listed in supplementary material as 0.08) is wrong. When I simulate the model with m=0.8 the simulation result is much closer to what is shown in Fig. 6D. Please check, and correct the parameter values for the reproduction of the first output signal shown in Fig 6d (panel a in supplementary material; lines 182-183).”*

Prof. Snoep is right to point out the information we provided does not allow reproduction of the figure, and that this is due to a typo in the value of parameter m. The value is actually correct, but the parameter is named incorrectly – the parameter we modified was b, not m. It should therefore read b=0.08. There was also a shift of 0.25 units in the vertical axis (Figure S7A), which we now fixed. We apologise for these errors.

*“Fig EV3 A could be reproduced, although it appears that there is a shift in y-axis. Please check your simulations against the results in JWS Online (see below). For the simulations I only change the parameter kb from 0.1 to 10 (all other parameter values have default values).”*

In Figure EV3A (high light condition) two parameters were changed, kb (from 0.1 h<sup>-1</sup> to 10 h<sup>-1</sup>) and Tc (19.5 h to 9.3 h). This is stated in lines 174-176 of the Appendix (2nd paragraph after Table S1). However, in the SBML file the name Tc was used for a different parameter: the period of the clock, Tc = 24 h. The parameter referred to as Tc in the text actually referred to Td in the code file (default value of 19.5 h). For consistency, we now renamed this parameter, Td, in the text and in Table S1. Changing kb alone does indeed result in the trace displayed in JWS Online, but changing both parameters reproduces our figure.

*“Fig EV3 B could not be reproduced. For the simulation I only change the parameter Tc to 9.3 (all other parameter values have default values). Please specify how Figure EV3B was produced, i.e. specify what model variables correspond to the SigC low light and SigC high light lines. Please*



*specify the parameters that were changed compared to the default model (if anything more than parameter Ty).“*

We thank Prof. Snoep for picking up a potential source of confusion in this panel. We had not stated what form of SigC is being plotted in this panel. We are plotting the sum of the active and inactive forms of SigC (in the SBML file nomenclature, SigC + SigC\_a (1)), because this is the only quantity we can directly relate to the transcriptional reporter we use in the experiments. This is now stated in the figure legend and also in the Appendix text.

(1) For consistency, we renamed the active form – from to – in the text.

As for the parameters, in the high light case (dashed line) these are the same as in Figure EV3A (i.e., both kb modified to 10 h<sup>-1</sup> and Td (see above for change in nomenclature) modified to 9.3 h. All other parameters are the default parameters). In the low light case (solid line), the parameters are set as in Figure 4.

We have modified the text to include specific references to individual panels and traces, in order to make these parameter changes clearer to the reader.

Finally, in the SBML file, we renamed all parameters whose names were not consistent with how they were named in the text.

3rd Editorial Decision

23 November 2016

Thank you again for sending us your revised manuscript. I have circulated to Prof. Snoep the corrections related to the model and he has confirmed that all figures can be reproduced with this additional information. As such, I am pleased to inform you that your paper has been accepted for publication.

YOU MUST COMPLETE ALL CELLS WITH A PINK BACKGROUND ↓

PLEASE NOTE THAT THIS CHECKLIST WILL BE PUBLISHED ALONGSIDE YOUR PAPER

Corresponding Author Name: James C. W. Locke

Journal Submitted to: Molecular Systems Biology

Manuscript Number: MSB-16-7087

**Reporting Checklist For Life Sciences Articles (Rev. July 2015)**

This checklist is used to ensure good reporting standards and to improve the reproducibility of published results. These guidelines are consistent with the Principles and Guidelines for Reporting Preclinical Research issued by the NIH in 2014. Please follow the journal's authorship guidelines in preparing your manuscript.

**A- Figures****1. Data****The data shown in figures should satisfy the following conditions:**

- the data were obtained and processed according to the field's best practice and are presented to reflect the results of the experiments in an accurate and unbiased manner.
- figure panels include only data points, measurements or observations that can be compared to each other in a scientifically meaningful way.
- graphs include clearly labeled error bars for independent experiments and sample sizes. Unless justified, error bars should not be shown for technical replicates.
- if  $n < 5$ , the individual data points from each experiment should be plotted and any statistical test employed should be justified
- Source Data should be included to report the data underlying graphs. Please follow the guidelines set out in the author ship guidelines on Data Presentation.

**2. Captions****Each figure caption should contain the following information, for each panel where they are relevant:**

- a specification of the experimental system investigated (eg cell line, species name).
- the assay(s) and method(s) used to carry out the reported observations and measurements
- an explicit mention of the biological and chemical entity(ies) that are being measured.
- an explicit mention of the biological and chemical entity(ies) that are altered/varied/perturbed in a controlled manner.
- the exact sample size (n) for each experimental group/condition, given as a number, not a range;
- a description of the sample collection allowing the reader to understand whether the samples represent technical or biological replicates (including how many animals, litters, cultures, etc.).
- a statement of how many times the experiment shown was independently replicated in the laboratory.
- definitions of statistical methods and measures:
  - common tests, such as t-test (please specify whether paired vs. unpaired), simple  $\chi^2$  tests, Wilcoxon and Mann-Whitney tests, can be unambiguously identified by name only, but more complex techniques should be described in the methods section;
  - are tests one-sided or two-sided?
  - are there adjustments for multiple comparisons?
  - exact statistical test results, e.g., P values = x but not P values < x;
  - definition of 'center values' as median or average;
  - definition of error bars as s.d. or s.e.m.

Any descriptions too long for the figure legend should be included in the methods section and/or with the source data.

Please ensure that the answers to the following questions are reported in the manuscript itself. We encourage you to include a specific subsection in the methods section for statistics, reagents, animal models and human subjects.

In the pink boxes below, provide the page number(s) of the manuscript draft or figure legend(s) where the information can be located. Every question should be answered. If the question is not relevant to your research, please write NA (non applicable).

**B- Statistics and general methods**

Please fill out these boxes ↓ (Do not worry if you cannot see all your text once you press return)

|                                                                                                                                                                                         |                                                                                                                                                                                                                                            |
|-----------------------------------------------------------------------------------------------------------------------------------------------------------------------------------------|--------------------------------------------------------------------------------------------------------------------------------------------------------------------------------------------------------------------------------------------|
| 1.a. How was the sample size chosen to ensure adequate power to detect a pre-specified effect size?                                                                                     | In our study we did not seek to detect a pre-specified effect size.                                                                                                                                                                        |
| 1.b. For animal studies, include a statement about sample size estimate even if no statistical methods were used.                                                                       | NA                                                                                                                                                                                                                                         |
| 2. Describe inclusion/exclusion criteria if samples or animals were excluded from the analysis. Were the criteria pre-established?                                                      | NA                                                                                                                                                                                                                                         |
| 3. Were any steps taken to minimize the effects of subjective bias when allocating animals/samples to treatment (e.g. randomization procedure)? If yes, please describe.                | NA                                                                                                                                                                                                                                         |
| For animal studies, include a statement about randomization even if no randomization was used.                                                                                          | NA                                                                                                                                                                                                                                         |
| 4.a. Were any steps taken to minimize the effects of subjective bias during group allocation or/and when assessing results (e.g. blinding of the investigator)? If yes please describe. | NA                                                                                                                                                                                                                                         |
| 4.b. For animal studies, include a statement about blinding even if no blinding was done                                                                                                | NA                                                                                                                                                                                                                                         |
| 5. For every figure, are statistical tests justified as appropriate?                                                                                                                    | We did not perform statistical tests in this study.                                                                                                                                                                                        |
| Do the data meet the assumptions of the tests (e.g., normal distribution)? Describe any methods used to assess it.                                                                      | NA                                                                                                                                                                                                                                         |
| Is there an estimate of variation within each group of data?                                                                                                                            | Yes. Standard deviations are represented in all figures presenting average times traces across many cells and movies, except for Figure 2, Appendix Figure S1 and Appendix Figure S3, where the standard error of the mean is represented. |
| Is the variance similar between the groups that are being statistically compared?                                                                                                       | NA                                                                                                                                                                                                                                         |

**C- Reagents****USEFUL LINKS FOR COMPLETING THIS FORM**

<http://www.antibodypedia.com>  
<http://1degreebio.org>  
<http://www.equator-network.org/reporting-guidelines/improving-bioscience-research-repo>  
  
<http://grants.nih.gov/grants/olaw/olaw.htm>  
<http://www.mrc.ac.uk/Ourresearch/Ethicsresearchguidance/Useofanimals/index.htm>  
<http://ClinicalTrials.gov>  
<http://www.consort-statement.org>  
<http://www.consort-statement.org/checklists/view/32-consort/66-title>  
  
<http://www.equator-network.org/reporting-guidelines/reporting-recommendations-for-tun>  
  
<http://datadryad.org>  
  
<http://figshare.com>  
  
<http://www.ncbi.nlm.nih.gov/gap>  
  
<http://www.ebi.ac.uk/ega>  
  
<http://biomodels.net/>  
  
<http://biomodels.net/miriam/>  
<http://jij.biochem.sun.ac.za>  
[http://oba.od.nih.gov/biosecurity/biosecurity\\_documents.html](http://oba.od.nih.gov/biosecurity/biosecurity_documents.html)  
<http://www.selectagents.gov/>

|                                                                                                                                                                                                                                                                                                                              |    |
|------------------------------------------------------------------------------------------------------------------------------------------------------------------------------------------------------------------------------------------------------------------------------------------------------------------------------|----|
| 6. To show that antibodies were profiled for use in the system under study (assay and species), provide a citation, catalog number and/or clone number, supplementary information or reference to an antibody validation profile. e.g., Antibodypedia (see link list at top right), 1DegreeBio (see link list at top right). | NA |
| 7. Identify the source of cell lines and report if they were recently authenticated (e.g., by STR profiling) and tested for mycoplasma contamination.                                                                                                                                                                        | NA |

\* for all hyperlinks, please see the table at the top right of the document

#### D- Animal Models

|                                                                                                                                                                                                                                                                                                                                                                                    |    |
|------------------------------------------------------------------------------------------------------------------------------------------------------------------------------------------------------------------------------------------------------------------------------------------------------------------------------------------------------------------------------------|----|
| 8. Report species, strain, gender, age of animals and genetic modification status where applicable. Please detail housing and husbandry conditions and the source of animals.                                                                                                                                                                                                      | NA |
| 9. For experiments involving live vertebrates, include a statement of compliance with ethical regulations and identify the committee(s) approving the experiments.                                                                                                                                                                                                                 | NA |
| 10. We recommend consulting the ARRIVE guidelines (see link list at top right) (PLoS Biol. 8(6), e1000412, 2010) to ensure that other relevant aspects of animal studies are adequately reported. See author guidelines, under 'Reporting Guidelines'. See also: NIH (see link list at top right) and MRC (see link list at top right) recommendations. Please confirm compliance. | NA |

#### E- Human Subjects

|                                                                                                                                                                                                                                                                                                                    |    |
|--------------------------------------------------------------------------------------------------------------------------------------------------------------------------------------------------------------------------------------------------------------------------------------------------------------------|----|
| 11. Identify the committee(s) approving the study protocol.                                                                                                                                                                                                                                                        | NA |
| 12. Include a statement confirming that informed consent was obtained from all subjects and that the experiments conformed to the principles set out in the WMA Declaration of Helsinki and the Department of Health and Human Services Belmont Report.                                                            | NA |
| 13. For publication of patient photos, include a statement confirming that consent to publish was obtained.                                                                                                                                                                                                        | NA |
| 14. Report any restrictions on the availability (and/or on the use) of human data or samples.                                                                                                                                                                                                                      | NA |
| 15. Report the clinical trial registration number (at ClinicalTrials.gov or equivalent), where applicable.                                                                                                                                                                                                         | NA |
| 16. For phase II and III randomized controlled trials, please refer to the CONSORT flow diagram (see link list at top right) and submit the CONSORT checklist (see link list at top right) with your submission. See author guidelines, under 'Reporting Guidelines'. Please confirm you have submitted this list. | NA |
| 17. For tumor marker prognostic studies, we recommend that you follow the REMARK reporting guidelines (see link list at top right). See author guidelines, under 'Reporting Guidelines'. Please confirm you have followed these guidelines.                                                                        | NA |

#### F- Data Accessibility

|                                                                                                                                                                                                                                                                                                                                                                                                                                                                                                                                                                                                                                                                                                   |                                                                                                                                                                                                                                                                         |
|---------------------------------------------------------------------------------------------------------------------------------------------------------------------------------------------------------------------------------------------------------------------------------------------------------------------------------------------------------------------------------------------------------------------------------------------------------------------------------------------------------------------------------------------------------------------------------------------------------------------------------------------------------------------------------------------------|-------------------------------------------------------------------------------------------------------------------------------------------------------------------------------------------------------------------------------------------------------------------------|
| 18. Provide accession codes for deposited data. See author guidelines, under 'Data Deposition'.<br>Data deposition in a public repository is mandatory for:<br>a. Protein, DNA and RNA sequences<br>b. Macromolecular structures<br>c. Crystallographic data for small molecules<br>d. Functional genomics data<br>e. Proteomics and molecular interactions                                                                                                                                                                                                                                                                                                                                       | NA                                                                                                                                                                                                                                                                      |
| 19. Deposition is strongly recommended for any datasets that are central and integral to the study; please consider the journal's data policy. If no structured public repository exists for a given data type, we encourage the provision of datasets in the manuscript as a Supplementary Document (see author guidelines under 'Expanded View' or in unstructured repositories such as Dryad (see link list at top right) or Figshare (see link list at top right)).                                                                                                                                                                                                                           | We provide source data for all histograms presented in the main figures: Figure 1B,C,E,F, Figure 3B,D and Figure 5B,D. We do the same for all Expanded View figures: Figure EV2 and Figure EV4A,C. These data are submitted in separate files alongside the manuscript. |
| 20. Access to human clinical and genomic datasets should be provided with as few restrictions as possible while respecting ethical obligations to the patients and relevant medical and legal issues. If practically possible and compatible with the individual consent agreement used in the study, such data should be deposited in one of the major public access-controlled repositories such as dbGAP (see link list at top right) or EGA (see link list at top right).                                                                                                                                                                                                                     | NA                                                                                                                                                                                                                                                                      |
| 21. As far as possible, primary and referenced data should be formally cited in a Data Availability section. Please state whether you have included this section.<br><br>Examples:<br><b>Primary Data</b><br>Wetmore KM, Deutschbauer AM, Price MN, Arkin AP (2012). Comparison of gene expression and mutant fitness in <i>Shewanella oneidensis</i> MR-1. Gene Expression Omnibus GSE39462<br><b>Referenced Data</b><br>Huang J, Brown AF, Lei M (2012). Crystal structure of the TRBD domain of TERT and the CR4/5 of TR. Protein Data Bank 4O26<br>AP-MS analysis of human histone deacetylase interactions in CEM-T cells (2013). PRIDE PXD000208                                            | NA                                                                                                                                                                                                                                                                      |
| 22. Computational models that are central and integral to a study should be shared without restrictions and provided in a machine-readable form. The relevant accession numbers or links should be provided. When possible, standardized format (SBML, CellML) should be used instead of scripts (e.g. MATLAB). Authors are strongly encouraged to follow the MIRIAM guidelines (see link list at top right) and deposit their model in a public database such as Biocompare (see link list at top right) or JWS Online (see link list at top right). If computer source code is provided with the paper, it should be deposited in a public repository or included in supplementary information. | We provide source code for the mathematical model developed in the manuscript. The code is in the SBML format and the parameters are set as in Appendix Table S1 and Figure 4B (wild type trace). This code is submitted as a separate file alongside the manuscript.   |

#### G- Dual use research of concern

|                                                                                                                                                                                                                                                                                               |    |
|-----------------------------------------------------------------------------------------------------------------------------------------------------------------------------------------------------------------------------------------------------------------------------------------------|----|
| 23. Could your study fall under dual use research restrictions? Please check biosecurity documents (see link list at top right) and list of select agents and toxins (APHIS/CDC (see link list at top right)). According to our biosecurity guidelines, provide a statement only if it could. | NA |
|-----------------------------------------------------------------------------------------------------------------------------------------------------------------------------------------------------------------------------------------------------------------------------------------------|----|
